# Supplementary material for: Direct aluminium-alloy upcycling from entire end-of life vehicles
Source: Research Square preprint supplement (doi:10.21203/rs.3.rs-7059967/v1), 2025-08-13
Supplement: Supplementary file 1 [file a98985b83dc0d97df067b65f.pdf]

# Direct aluminium-alloy upcycling from complete end-of-life vehicles: Supplementary information

P. Krall<sup>1</sup>, I. Weißensteiner<sup>2</sup>, P. Aster<sup>2</sup>, P. Dumitraschkewitz<sup>1</sup>, M. A. Tunes<sup>1</sup>, T. M. Kremmer<sup>1</sup>, S. Samberger<sup>1</sup>, B. Trink<sup>3</sup>, S. Pogatscher<sup>1</sup>.

## Supplementary Note 1: Composition scenarios

The three investigated alloys arise from a theoretically calculated composition that would arise from complete melting of the aluminium alloys of three different vehicle types. Their compositions and further a 6016 reference alloy are shown in **Supplementary Table 1**. The basic concept and the results for a low-iron containing last laboratory cooled (60 K/s)-material was presented in our previous work [SR1].

**Supplementary Table 1: Chemical composition of the investigated alloys oriented on three different vehicle types.** The ELV-mixes are based on today's average European vehicle (EU), a US pickup-truck (PU) and an electric car (EC) with aluminium representing the balance to 100 % (Bal.).

| Alloy    | Si [%] | Fe [%] | Cu [%] | Mn [%] | Mg [%] | Zn [%] | Al [%] |
|----------|--------|--------|--------|--------|--------|--------|--------|
| EU       | 5.20   | 1.20   | 0.70   | 0.30   | 0.75   | 0.40   | Bal.   |
| PU       | 4.75   | 1.30   | 1.30   | 0.30   | 0.70   | 0.50   | Bal.   |
| EC       | 1.50   | 1.00   | 0.20   | 0.30   | 1.50   | 0.10   | Bal.   |
| 6016 Ref | 1.06   | 0.19   | 0.05   | 0.06   | 0.33   | 0.01   | Bal.   |

## Supplementary Note 2: Heat treatment and processing sequences

For the three alloys, different sequences of heat treatment and processing were applied to the as-cast state (CS). This includes homogenizing (H), solution annealing, pre-ageing (PA), natural ageing (NA) and paint-baking (PB). A part of the samples was also pre-strained (PS) to 2 and 5 % plastic deformation. **Supplementary Table 2** gives an overview over the applied parameters, while **Supplementary Figure 1** graphically illustrates the processing ways starting from solution annealing.

**Supplementary Table 2: Summary of the applied heat treatments.**

| Condition  | Homo-<br>genising   | Solution<br>annealing                    | Pre-<br>ageing  | Natural<br>ageing | Pre-<br>straining | Paint-<br>baking   |  |
|------------|---------------------|------------------------------------------|-----------------|-------------------|-------------------|--------------------|--|
| CS         | -                   | -                                        | -               | -                 | -                 | -                  |  |
| H          | 10 h                | -                                        | -               | -                 | -                 | -                  |  |
| PA         | heating<br>450 °C / | 520 °C /<br>10 min<br>Water<br>quenching | 100 °C /<br>5 h | -                 | -                 | -                  |  |
| NAPB       | 10 h                |                                          | -               | 25 °C /<br>14 d   | -                 | 180 °C /<br>20 min |  |
| PANAPB     | 7 h                 |                                          | 100 °C /<br>5 h |                   | -                 |                    |  |
| PANA2%PSPB | heating<br>520 °C / |                                          |                 |                   | 2 %               |                    |  |
| PANA5%PSPB | 10 h                |                                          |                 |                   | 5 %               |                    |  |

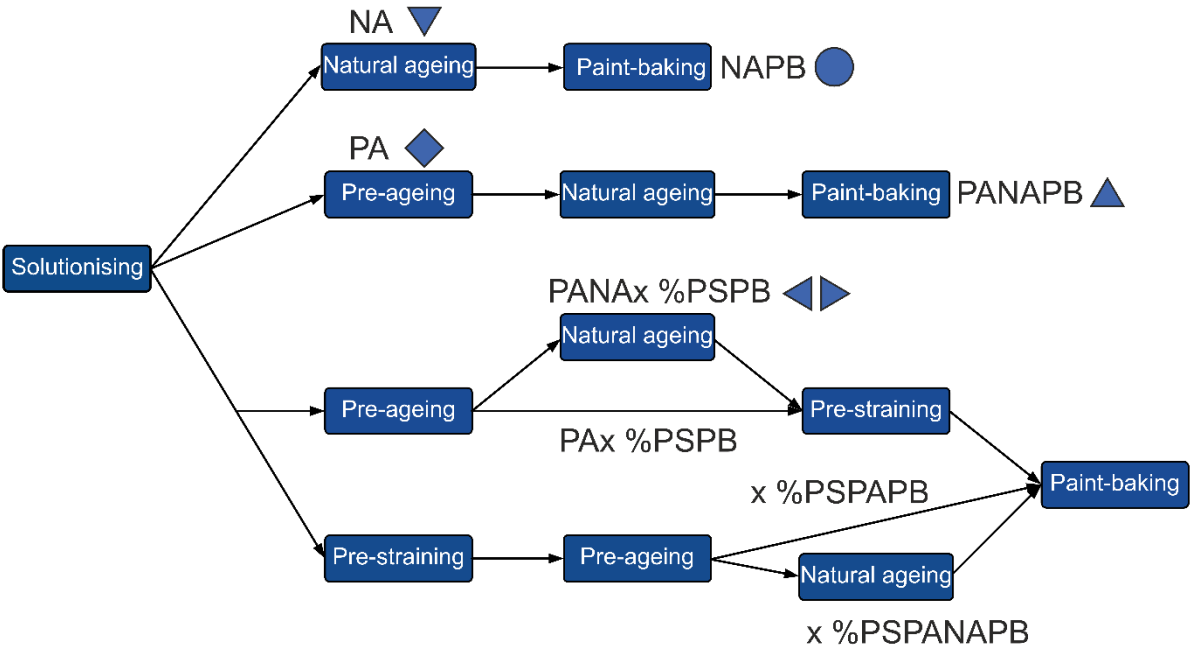

**Supplementary Figure 1: Age hardening process.** Schematic illustration of the heat treatment procedure with and without pre-deformation and symbols indicating the processing way in **Supplementary Figure 2**.

### Supplementary Note 3: Results of tensile testing

Tensile testing was conducted for all alloys in the conditions described in **Supplementary Figure 1**. A general overview of the performance of the alloys compared to common automotive wrought and cast alloys is given in **Supplementary Figure 2**. **Supplementary Figure 3** thereby shows the results for the EU and EC-alloy in as-cast and homogenized conditions. **Supplementary Figure 4 – Supplementary Figure 6** show the results of the tensile tests of the different alloys after processing and further determining the strain-hardening potential on hand of Kocks-Mecking plots.

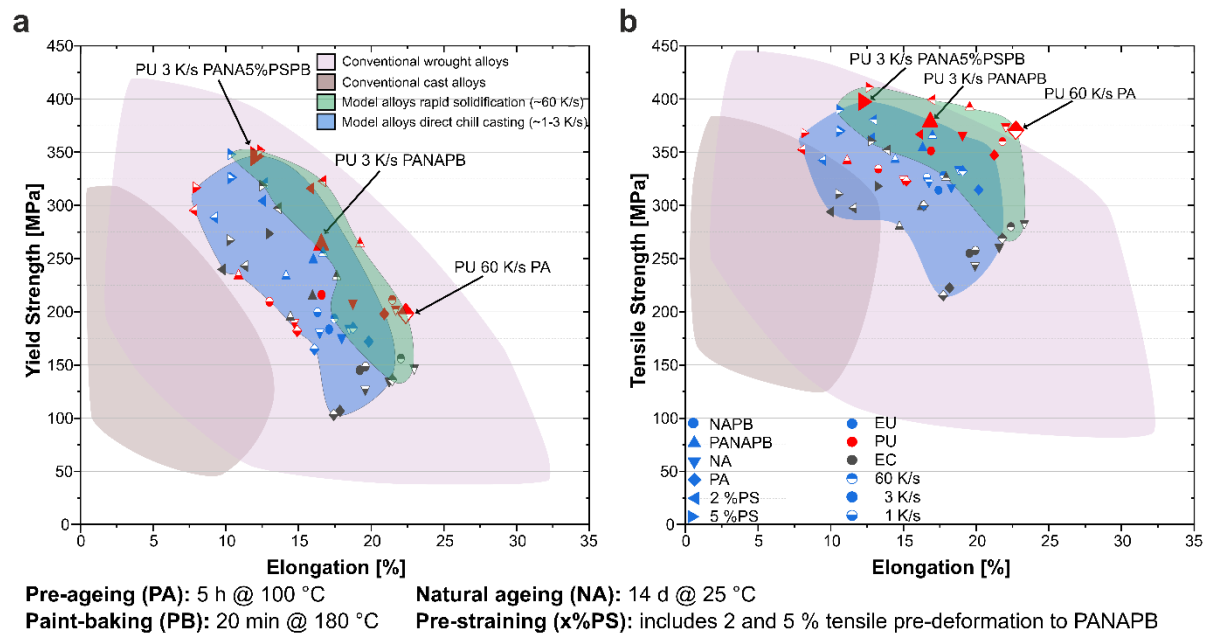

**Supplementary Figure 2: Strength-ductility plot comparing today's commercial automotive alloys (wrought and cast alloys) from the literature to the investigated alloys. a** Compares the yield-strengths to commercial alloys from literature [SR2]. **b** Compares the tensile strengths to commercial alloys. **a** and **b** include different cooling conditions (mimicking rapid solidification and direct chill casting)

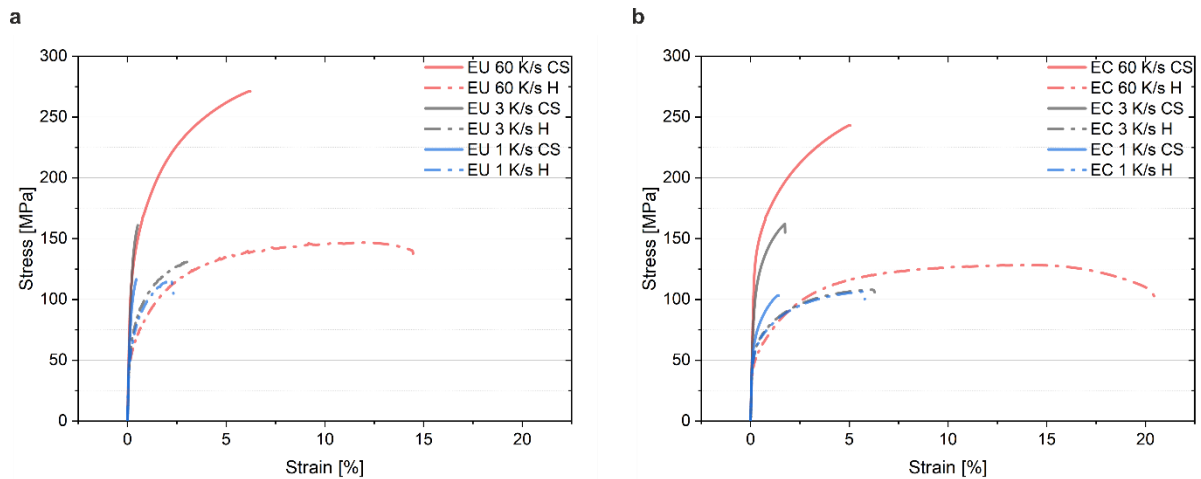

**Supplementary Figure 3: Results of tensile tests in as-cast and homogenized conditions a All cooling rates for alloy EU ND. b All cooling rates for alloy EC ND.**

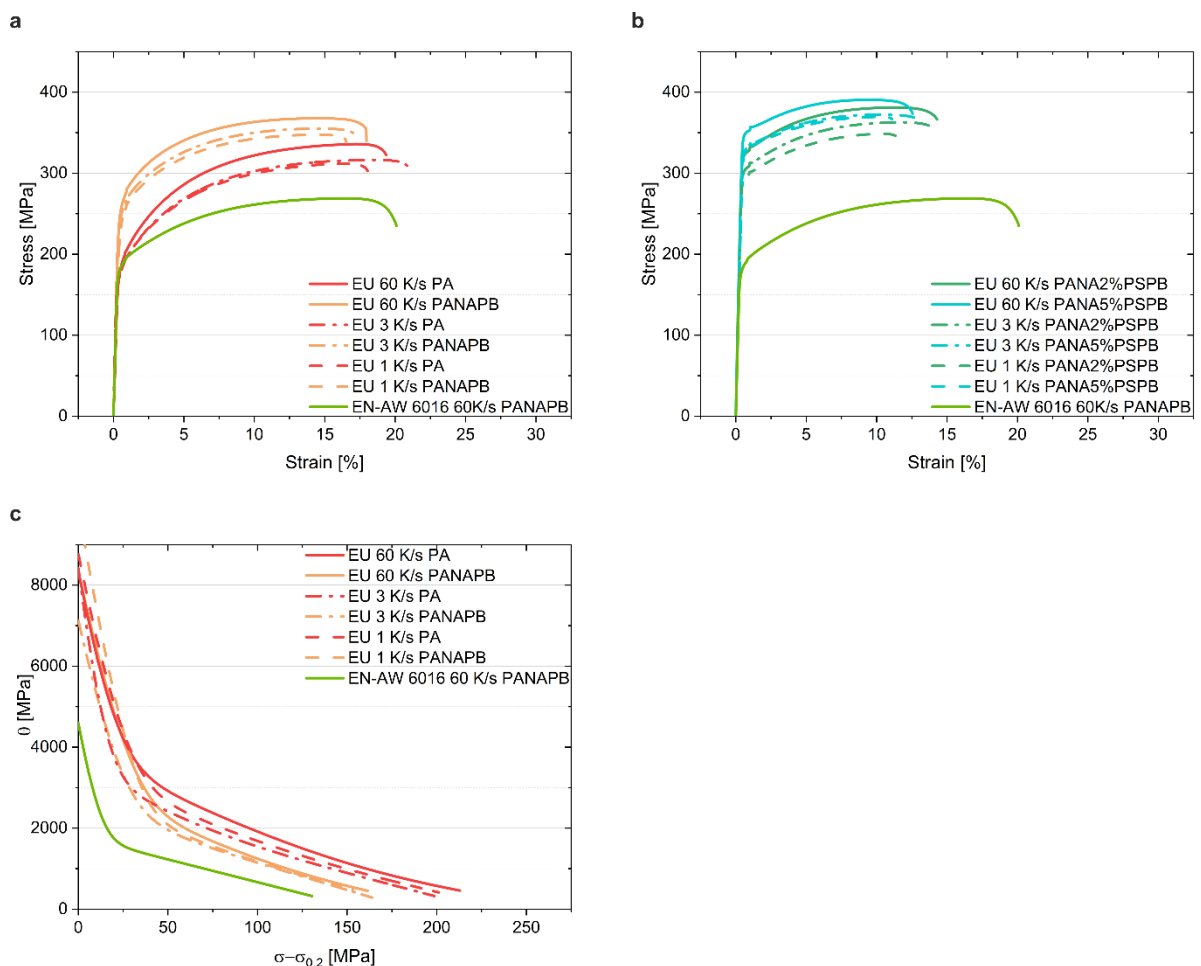

**Supplementary Figure 4: Influence of heat treatments and pre-deformation on alloy EU ND for all cooling rates a Results of the tensile tests for processing routes without pre-deformation in comparison to common automotive sheet alloy 6016. b Results of the tensile tests for processing routes including pre-deformation in comparison to common automotive sheet alloy 6016. c Kocks-Mecking-plots of the processing routes without pre-**

deformation showing higher strain-hardening potential than common automotive aluminium sheet alloy.

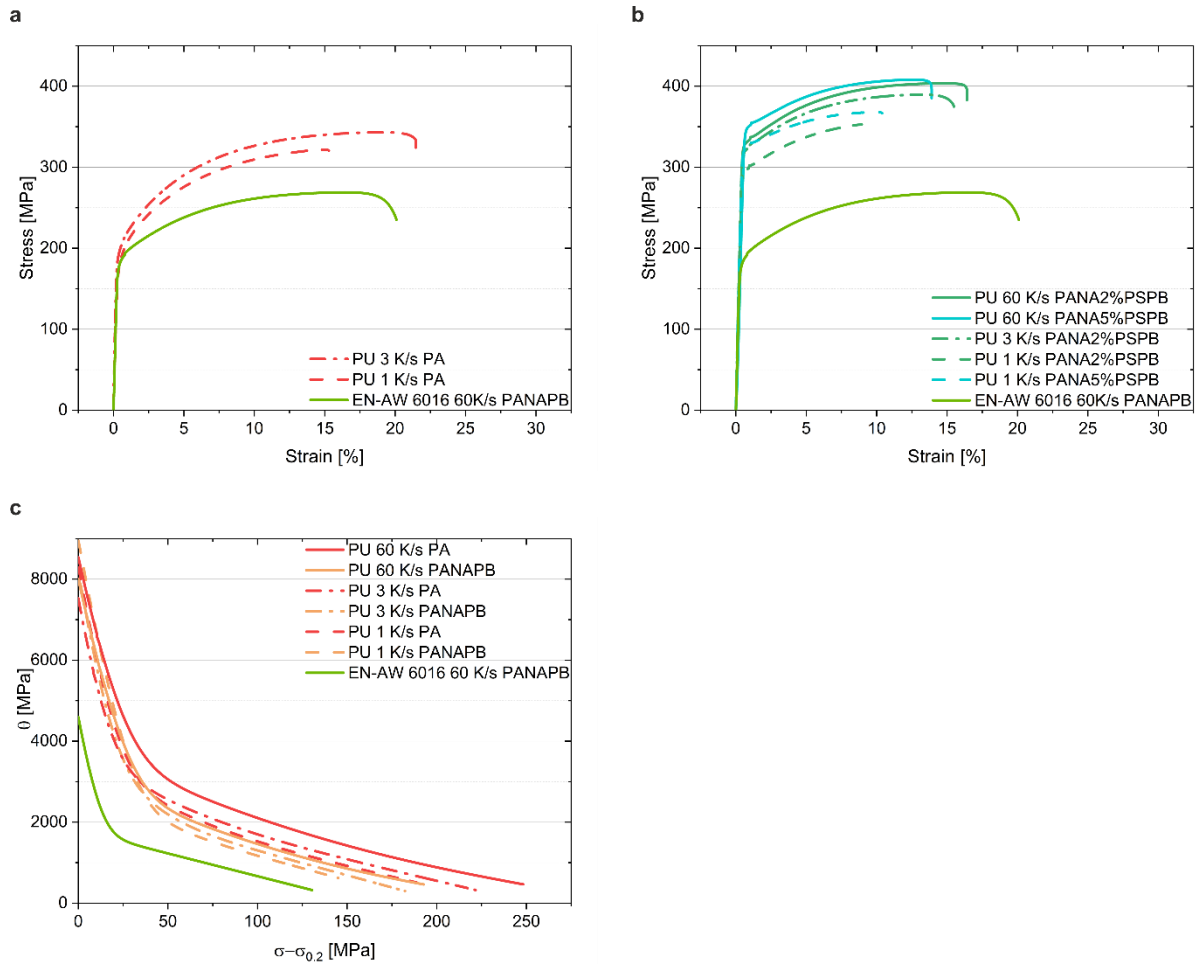

**Supplementary Figure 5: Influence of heat treatments and pre-deformation on the remaining conditions of alloy PU ND for all cooling rates** **a** Results of the tensile tests for processing routes without pre-deformation in comparison to common automotive sheet alloy 6016. **b** Results of the tensile tests for processing routes including pre-deformation in comparison to common automotive sheet alloy 6016. **c** Kocks-Mecking-plots of the processing routes without pre-deformation showing higher strain-hardening potential than common automotive aluminium sheet alloy.

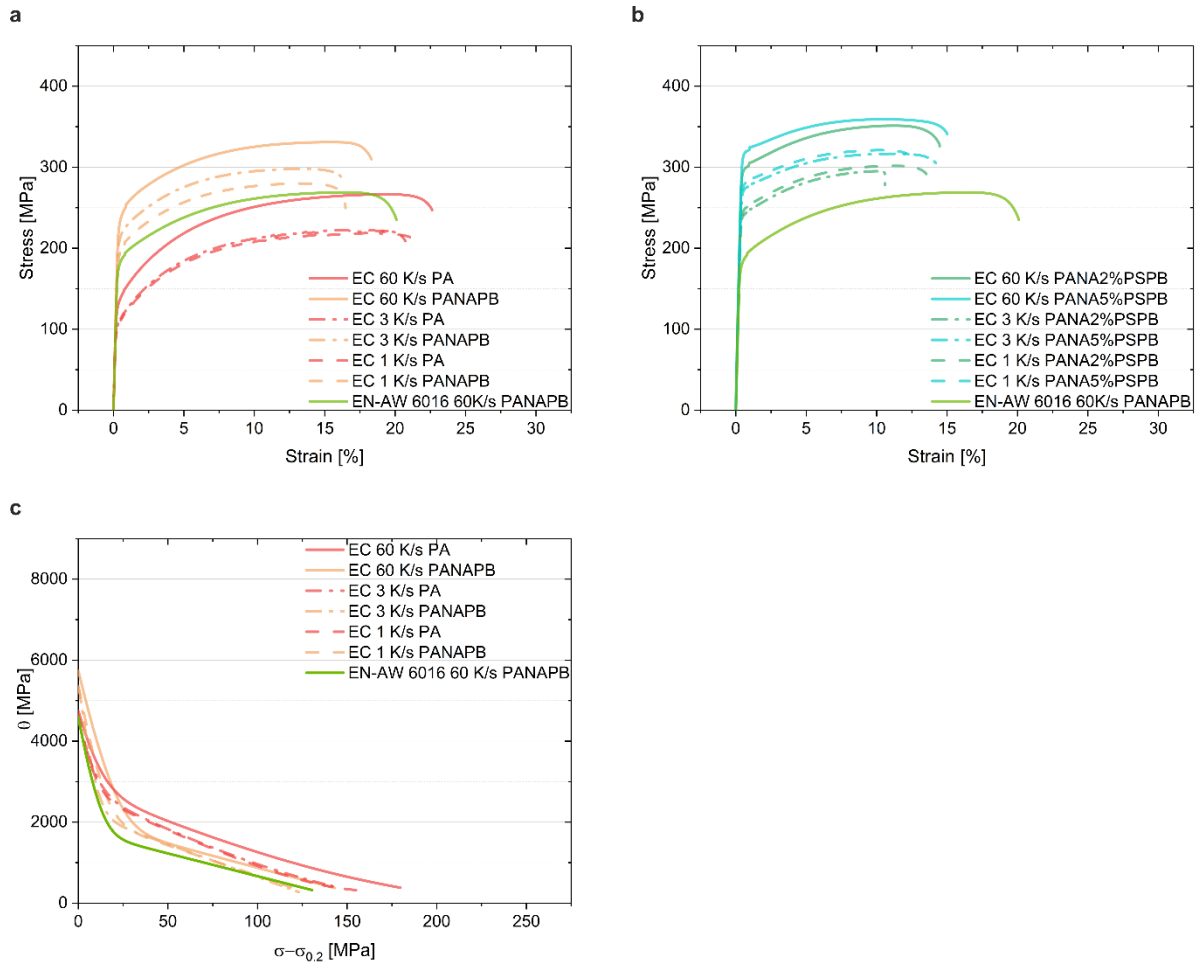

**Supplementary Figure 6: Influence of heat treatments and pre-deformation on alloy EC ND for all cooling rate** **a** Results of the tensile tests for processing routes without pre-deformation in comparison to common automotive sheet alloy 6016. **b** Results of the tensile tests for processing routes including pre-deformation in comparison to common automotive sheet alloy 6016. **c** Kocks-Mecking-plots of the processing routes without pre-deformation showing higher strain-hardening potential than common automotive aluminium sheet alloy.

#### Supplementary Note 4: Results of EBSD investigations

The microscopic investigations included SEM-micrographs of the PU-alloy in all cooling conditions after 5 % pre-straining. The EBSD-mappings (Supplementary Figure 7a-c) were measured after paint-baking, whilst KAM-mappings (Supplementary Figure 7d-f) were taken after deformation to uniform elongation. At a cooling rate of 1 K/s, grains larger than 40  $\mu\text{m}$  are prevalent, whereas at 3 K/s, fewer large grains are observed in the material (Supplementary Figure 7a–c). In contrast, no grains exceeding 30  $\mu\text{m}$  appear in the 60 K/s.

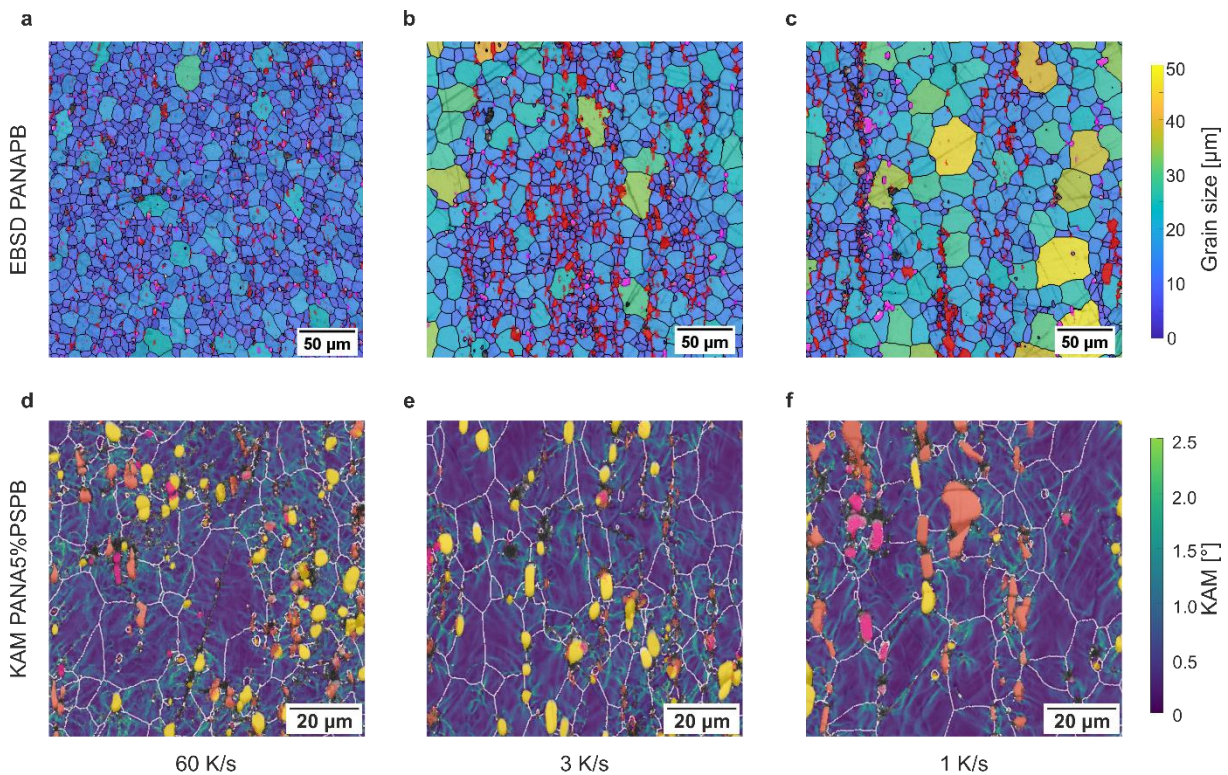

**Supplementary Figure 7: Scanning electron microscopic investigation of the PU-alloy. a-c** EBSD-mappings of the alloy PU alloy after pre-aging, natural aging and paint-bake treatment (PANAPB) following different cooling rates upon casting measured before deformation. **d-f** KAM-overlay maps of the PU alloy after pre-aging, natural aging, 5 % pre-straining and paint-bake treatment (PANA5%PSPB), following different cooling rates upon casting measured at the uniform elongation. Grain boundaries are marked in white, with Si-dominant IMPs in yellow, Fe-dominant IMPs in orange, and Mg-dominant IMPs in pink.

## **Supplementary Note 5: Results of APT analysis**

After PA, more than 70 % of the detected clusters contain less than 33 atoms. In PANAPB this share is 53 % and 38 % in PANA5%PSPB. In contrast, 15 % contain more than 50 atoms after PA, while 36 % and 47 % do so for PANAPB and PANA5%PSPB respectively (see **Supplementary Figure 8a**). Regarding the Guinier-radius of the clusters and precipitates, 90 % are smaller than 2 nm in PA-condition, while for PANAPB and pre-strained states, almost 90 % have a Guinier-radius of 1–3 nm. It is conspicuous that the share of clusters and precipitates over 2 nm is larger in PANAPB than for pre-strained state (29 vs. 26 %). While the share of clusters/precipitates of more than 5 nm Guinier-radius is neglectable in PANAPB-material, in pre-strained condition it is at 2.2 % (see **Supplementary Figure 8b**). The median Guinier radii range from 1.26 nm in the PA state to 1.61 nm after 5% pre-straining. Chemically, both the paint-baking and the pre-straining processes generate higher median magnesium concentrations ( $\text{Mg}/(\text{Mg}+\text{Cu}+\text{Si}+\text{Zn})$ ) of 0.38 and 0.37, respectively, compared to 0.31 in the PA condition) (**Supplementary Fig. 8c**). An overview of the cluster chemistry in different processing conditions is given by **Supplementary Table 3**.

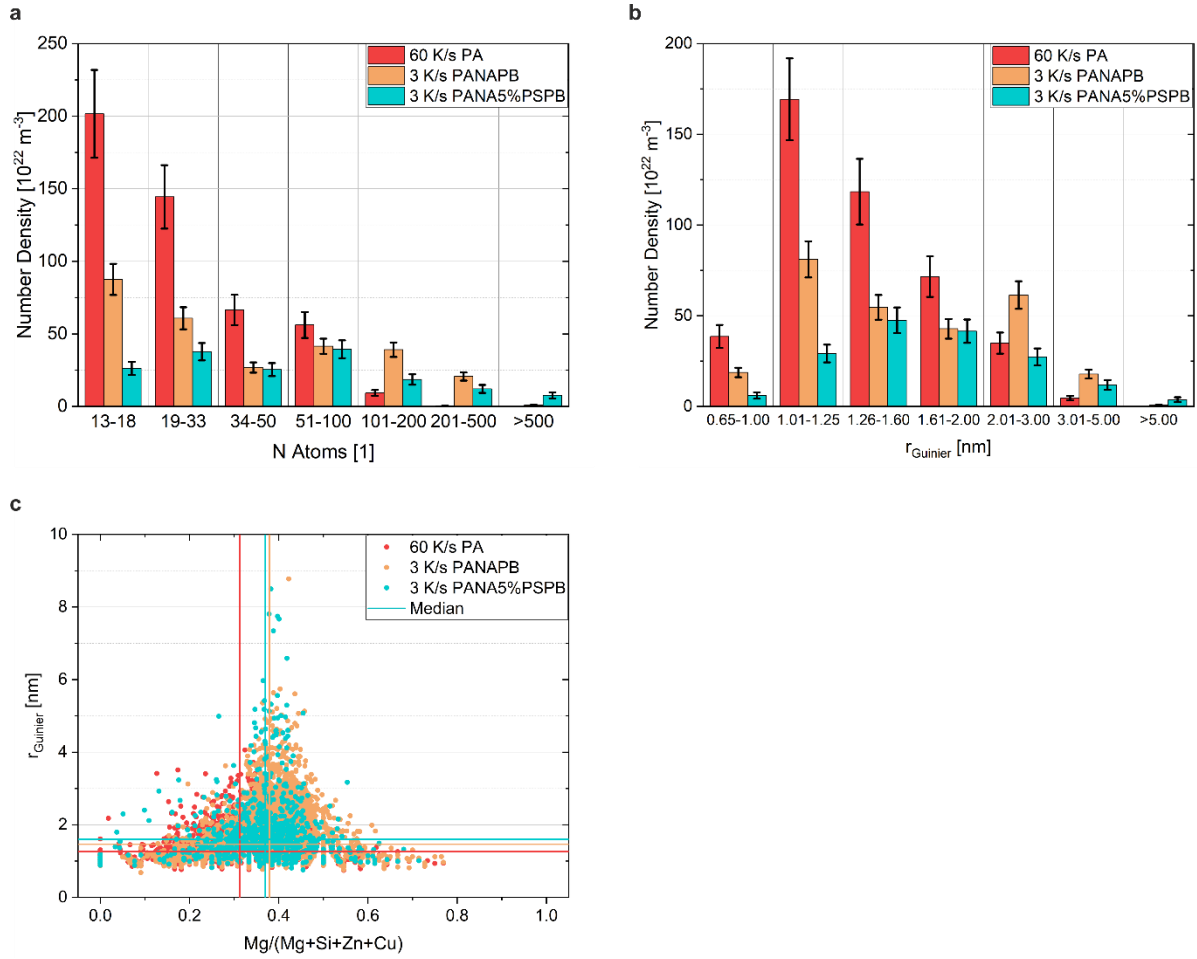

**Supplementary Figure 8: Results of APT investigations for different processing conditions.** **a** Number density of clusters and precipitates over their number of atoms for 60 K/s PA, 3 K/s PANAPB and 3 K/s PANA5 %PSPB. **b** Number density of clusters and precipitates over the Guinier-radius for 60 K/s PA, 3 K/s PANAPB and 3 K/s PANA5 %PSPB. **c** Guinier-radius in dependence of the Mg-ratio in clusters and precipitates for 60 K/s PA, 3 K/s PANAPB and 3 K/s PANA5 %PSPB.

**Supplementary Table 3: Chemical analysis of the clusters and precipitates for different processing conditions.**

| Alloy               | Composition                 | Mg               | Zn               | Cu               | Si               |
|---------------------|-----------------------------|------------------|------------------|------------------|------------------|
| PU 60 K/s PA        | Overall [at-%]              | $0.60 \pm 0.03$  | $0.40 \pm 0.03$  | $0.52 \pm 0.03$  | $1.12 \pm 0.03$  |
|                     | Matrix [at-%]               | $0.49 \pm 0.03$  | $0.40 \pm 0.03$  | $0.46 \pm 0.02$  | $0.98 \pm 0.02$  |
|                     | Cluster/Precipitates [at-%] | $2.22 \pm 0.10$  | $0.44 \pm 0.06$  | $1.29 \pm 0.06$  | $3.10 \pm 0.06$  |
|                     | Solute [%]                  | $24.58 \pm 0.40$ | $7.28 \pm 0.64$  | $16.55 \pm 0.48$ | $18.41 \pm 0.21$ |
|                     | Volume fraction [%]         | 1.48             |                  |                  |                  |
| PU 3 K/s PANAPB     | Overall [at-%]              | $0.57 \pm 0.02$  | $0.37 \pm 0.02$  | $0.43 \pm 0.02$  | $1.01 \pm 0.02$  |
|                     | Matrix [at-%]               | $0.37 \pm 0.01$  | $0.36 \pm 0.02$  | $0.37 \pm 0.02$  | $0.82 \pm 0.01$  |
|                     | Cluster/Precipitates [at-%] | $3.37 \pm 0.06$  | $0.43 \pm 0.06$  | $1.21 \pm 0.06$  | $3.65 \pm 0.06$  |
|                     | Solute [%]                  | $40.12 \pm 0.24$ | $8.01 \pm 0.41$  | $19.25 \pm 0.30$ | $24.69 \pm 0.13$ |
|                     | Volume fraction [%]         | 2.34             |                  |                  |                  |
| PU 3 K/s PANA5%PSPB | Overall [at-%]              | $0.59 \pm 0.04$  | $0.33 \pm 0.04$  | $0.47 \pm 0.04$  | $1.12 \pm 0.04$  |
|                     | Matrix [at-%]               | $0.19 \pm 0.02$  | $0.32 \pm 0.04$  | $0.32 \pm 0.03$  | $0.73 \pm 0.03$  |
|                     | Cluster/Precipitates [at-%] | $3.54 \pm 0.10$  | $0.41 \pm 0.11$  | $1.57 \pm 0.10$  | $3.92 \pm 0.10$  |
|                     | Solute [%]                  | $72.21 \pm 0.46$ | $14.95 \pm 0.89$ | $40.34 \pm 0.64$ | $42.35 \pm 0.24$ |
|                     | Volume fraction [%]         | 4.63             |                  |                  |                  |

## Supplementary Note 6: TEM Investigation

TEM-investigations reveal low dislocation density in the 60 K/s PA-sample (Supplementary Figure 9a), and 3 K/s PANAPB material in Supplementary Figure 9b compared to the pre-strained material in Fig. 3h.

For the confirmation of the Q'-hardening precipitates, the diffraction pattern of the PANA5 %PSPB was analysed and reconstructed as shown in Supplementary Figure 9c and in literature [SR3].

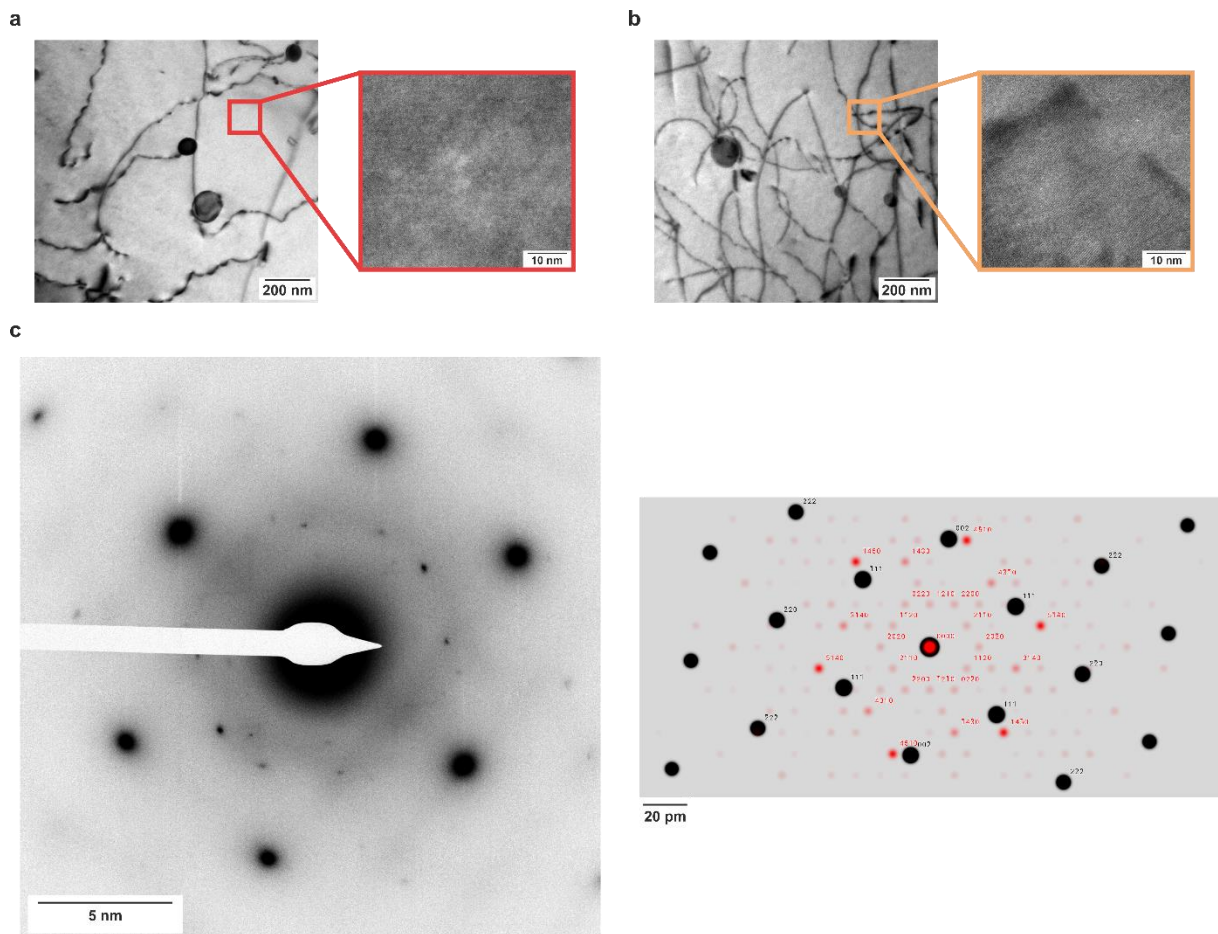

**Supplementary Figure 9: TEM images showing interactions of dislocations and particles. (a)** In the 60 K/s PA-material with high-resolution-insert. **(b)** For the 3 K/s PANAPB-sample with high-resolution-image inserted. **(c)** Diffraction pattern and indexing of the hardening precipitates in PANA5 %PSPB-material for confirmation of Q'-phase according to literature [SR3].

# Supplementary Note 7: Simulation of vacancy concentration, dislocation density and diffusion ways during pre-straining

According to Militzer et al.[SR4] and Robson[SR5] we calculate the initial ( $c_0$ , equation (1)) and excess vacancy concentration  $c_{ex}$  with equation (2). With the diffusion constant  $D$  (calculated according to (3)) and a diffusion enhancement factor  $f$  (equation (4)), the diffusion paths can be determined by (5). Equations (2) and (5) were thereby solved iteratively with an explicit integration scheme.

$$c_0 = 2.3 \cdot \exp\left(-\frac{H_V^f}{RT}\right) \quad (1)$$

$$\frac{dc_{ex}}{dt} = \chi \frac{\sigma \Omega_0}{H_V^f} \dot{\epsilon} - \left(\frac{D_V \rho}{\kappa^2} + \frac{D_V}{L^2}\right) c_{ex} \quad (2)$$

$$D_{Mg,Si,Cu} = D_{Mg,Si,Cu}^0 \cdot \exp\left(-\frac{H_{Mg,Si,Cu}^d - H_V^f}{RT}\right) \quad (3)$$

$$f = 1 + \frac{c_{ex}}{c_0} \quad (4)$$

$$x_{Mg,Zn,Cu}^2 = \int 4 \cdot f \cdot D_{Mg,Zn,Cu} \cdot dt \quad (5)$$

The effective diffusion in dependence of vacancy concentration and pipe-diffusion along dislocation cores can be expressed by (6). For the pipe-diffusion-coefficient  $D_p$  the activation energy for diffusion was assumed to be  $0.55 \cdot H_j^d$  (activation energy for lattice diffusion)[SR5].

$$D_{eff,Mg,Si,Cu} = D_{Mg,Si,Cu} \cdot \left(1 + \frac{c_{ex}}{c_0} + g \cdot \frac{D_{p,Mg,Si,Cu}}{D_{Mg,Si,Cu}}\right) \quad (6) \text{ with } g = 2 \cdot \Omega_0 \cdot \frac{\rho}{b}$$

The dislocation enhancement factor is defined as  $\left(1 + \frac{c_{ex}}{c_0} + g \cdot \frac{D_{p,Mg,Si,Cu}}{D_{Mg,Si,Cu}}\right)$ .

$$c_0 = 2.3 \cdot \exp\left(-\frac{64,000 \frac{J}{mol}}{8.314 \frac{J}{mol \cdot K} \cdot 373 K}\right) = 2.51 \cdot 10^{-9} = 2.51 \cdot 10^{-3} \text{ ppm}$$

$$\frac{c_{ex}}{c_0} = \frac{2 \cdot 10^3 \text{ ppm}}{2.51 \cdot 10^{-3} \text{ ppm}} = 8 \cdot 10^5$$

$$g = 2 \cdot 1.66 \cdot 10^{-29} \text{ m}^3 \cdot \frac{3 \cdot 10^{14} \text{ m}^{-2}}{2.86 \cdot 10^{-10} \text{ m}} = 3.48 \cdot 10^{-5}$$

163 As  $\frac{c_{ex}}{c_0}$  and  $g$  are constant for Mg, Si and Cu, only the dislocation enhancement by  
 164 dislocations (pipe-diffusion) has to be determined separately:  
 165

$$166 \quad g \cdot \frac{D_{pMg}}{D_{Mg}} = 3.48 \cdot 10^{-5} \cdot \frac{D_{0Mg} \cdot \exp \left( -\frac{0.55 \cdot 115,000 \frac{J}{mol}}{8.314 \frac{J}{mol \cdot K} \cdot 298 K} \right)}{D_{0Mg} \cdot \exp \left( -\frac{115,000 \frac{J}{mol}}{8.314 \frac{J}{mol \cdot K} \cdot 298 K} \right)} = 4.09 \cdot 10^4$$

$$167 \quad g \cdot \frac{D_{pSi}}{D_{Si}} = 1.46 \cdot 10^5$$

$$169 \quad g \cdot \frac{D_{pCu}}{D_{Cu}} = 1.55 \cdot 10^6$$

171  
 172 **The combined diffusion enhancement factor (excess vacancies and dislocations)**  
 173 **results  $8.41 \cdot 10^5$  for Mg,  $9.46 \cdot 10^5$  for Si and  $2.35 \cdot 10^6$  for Cu.**

174  
 175 The results for the calculations are shown in Supplementary Figure 10, for a summary of  
 176 the applied parameters see Supplementary Table 4.

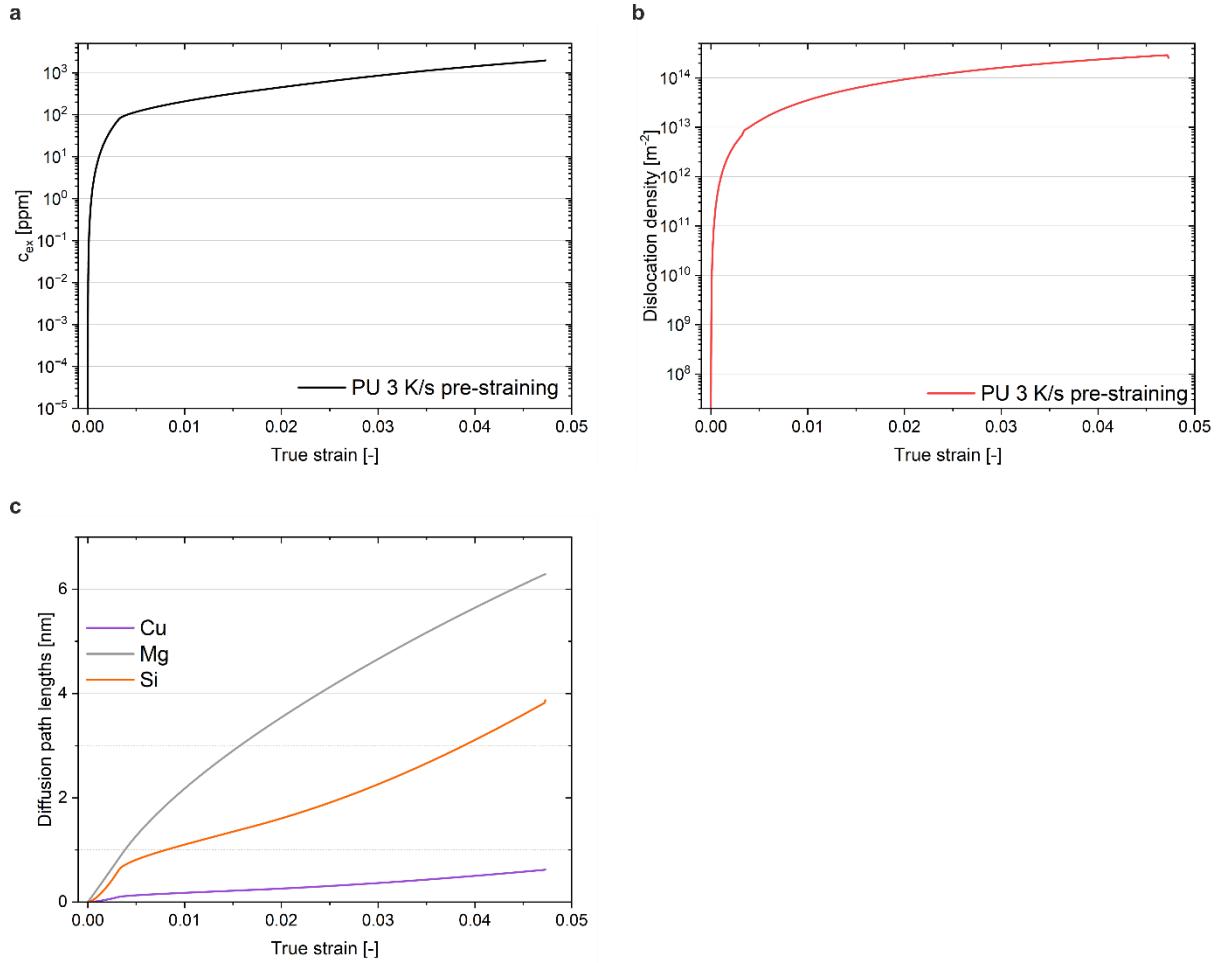

**Supplementary Figure 10: Diffusion enhancement by pre-straining.** **a** Introduction of excess vacancies during pre-deformation. **b** Increase of the dislocation density during pre-deformation resulting in more favourable nucleation places. **c** Extension of diffusion paths for Cu, Mg and Si through pre-straining.

**Supplementary Table 4: Summary of the applied parameters for vacancy, dislocation density and diffusion path calculations.**

| Parameter                                               | Notation           | Value                                                |
|---------------------------------------------------------|--------------------|------------------------------------------------------|
| Grain size—3 K/s                                        | $d_{3\text{ K/s}}$ | $\sim 16\text{ }\mu\text{m}$                         |
| Constant                                                | $\alpha$           | 0.3 [SR6]                                            |
| Taylor factor                                           | $M$                | 3.06 [SR6]                                           |
| Shear modulus                                           | $G$                | 25.4 GPa [SR6]                                       |
| Burgers vector                                          | $b$                | $0.286 \cdot 10^{-9}\text{ m}$ [SR6]                 |
| Fraction of external work stored by producing vacancies | $\chi$             | 0.1 [SR4, SR5]                                       |
| Atomic volume                                           | $\Omega_0$         | $1.66 \cdot 10^{-29}\text{ m}^3$ [SR5]               |
| Vacancy / self-diffusion enthalpy                       | $H_V^{sd}$         | $129\text{ kJ}\cdot\text{mol}^{-1}$ [SR7]            |
| Vacancy formation enthalpy                              | $H_V^f$            | $64\text{ kJ}\cdot\text{mol}^{-1}$ [SR7]             |
| Vacancy migration enthalpy                              | $H_V^m$            | $65\text{ kJ}\cdot\text{mol}^{-1}$ [SR5]             |
| Mg diffusion / Activation enthalpy                      | $H_{Mg}^d$         | $115\text{ kJ}\cdot\text{mol}^{-1}$ [SR8]            |
| Si diffusion / Activation enthalpy                      | $H_{Zn}^d$         | $122\text{ kJ}\cdot\text{mol}^{-1}$ [SR9]            |
| Cu diffusion / Activation enthalpy                      | $H_{Cu}^d$         | $135\text{ kJ}\cdot\text{mol}^{-1}$ [SR9]            |
| Pre-factor vacancy diffusion                            | $D_V^0$            | $3 \cdot 10^{-5}\text{ m}^2\cdot\text{s}^{-1}$ [SR5] |

|                         |            |                                                                    |
|-------------------------|------------|--------------------------------------------------------------------|
| Pre-factor Mg diffusion | $D_{Mg}^0$ | $6.23 \cdot 10^{-6} \text{ m}^2 \cdot \text{s}^{-1}$ [SR8]         |
| Pre-factor Si diffusion | $D_{Zn}^0$ | $1.19 \cdot 10^{-5} \text{ m}^2 \cdot \text{s}^{-1}$ [SR9]         |
| Pre-factor Cu diffusion | $D_{Cu}^0$ | $6.47 \cdot 10^{-5} \text{ m}^2 \cdot \text{s}^{-1}$ [SR9]         |
| Dislocation arrangement | $\kappa$   | 1.0 [SR4]                                                          |
| Gas constant            | $R$        | $8.314 \text{ J} \cdot \text{mol}^{-1} \cdot \text{K}^{-1}$ [SR10] |

184

## 185 **Supplementary References**

186 [SR1] Krall P., I. Weißensteiner and S. Pogatscher: Recycling aluminum alloys for the  
187 automotive industry: Breaking the source-sink paradigm. Resources, Conservation and  
188 Recycling, 202 (2024), 107370.  
189 [SR2] Granta Design Limited: CES EduPack2023, Cambridge (2023).  
190 [SR3] Arnberg L. et al.: The Crystal Structure of  $\text{Al}(x)\text{Cu}_2\text{Mg}(12-x)\text{Si}_7$ , (h-AlCuMgSi). Acta  
191 Chemica Scandinavica, 34a (1980), 1–5.  
192 [SR4] Militzer M., W. P. Sun and J. J. Jonas: Modelling the effect of deformation-induced  
193 vacancies on segregation and precipitation. Acta Metallurgica et Materialia, 42 (1994),  
194 133–141.  
195 [SR5] Robson J. D.: Deformation Enhanced Diffusion in Aluminium Alloys. Metallurgical  
196 Transactions A, 51 (2020), 5401–5413.  
197 [SR6] Cheng L. M. et al.: The influence of precipitation on the work-hardening behavior  
198 of the aluminum alloys AA6111 and AA7030. Metallurgical Transactions A, 34 (2003),  
199 2473–2481.  
200 [SR7] Mundy J. N.: Diffusion Mechanism in F.C.C. Metals. physica status solidi (b), 144  
201 (1987), 233–241.  
202 [SR8] Fujikawa S. and K. Hirano: Diffusion of  $^{28}\text{Mg}$  in aluminum. Materials Science and  
203 Engineering, 27 (1977), 25–33.  
204 [SR9] Czerwinski F.: Thermal Stability of Aluminum Alloys. Materials (Basel,  
205 Switzerland), 13 (2020) online proceedings.  
206 [SR10] Gottstein G.: Materialwissenschaft und Werkstofftechnik. Springer Berlin  
207 Heidelberg, Berlin, Heidelberg (2014).  
208
